# Supplementary material for: Reclassification of DMD Duplications as Benign: Recommendations for Cautious Interpretation of Variants Identified in Prenatal Screening
Source: MDPI journal article supplement (doi:10.3390/genes13111972), 2022-10-28
Supplement: s1 [file s1]

**Supplementary Table S1. Primers used in quantitative real-time PCR and breakpoint analysis**

| Primer ID    | Sequence (5' to 3')     |
|--------------|-------------------------|
| PMP22-QE1-F: | TGGAAGAAGGGGTTACGCTGTT  |
| PMP22-QE1-R: | GGGGGTGGGAAATTAGGCAATT  |
| PMP22-QE2-F: | CTGGTGCTGCTGTTCGTCTC    |
| PMP22-QE2-R: | AACACAGTCCTGAACCAGCA    |
| PMP22-QE3-F: | AGCAATGGATCGTGGGCAA     |
| PMP22-QE3-R: | CAAAACCAGCCTCACCGTTT    |
| PMP22-QE4-F: | GCCACCATGATCCTGTTCGAT   |
| PMP22-QE4-R: | CATTCCGCAGACTTGGATGC    |
| PMP22-QE5-F: | GAGTGGCATCTCAACTCGGAT   |
| PMP22-QE5-R: | CGCGTTTCCGCAAGATCAC     |
| DMD-63-a     | CATTCACAGAAATGCAGGCT    |
| DMD-63-b     | GTGTGAAACCAAGACAACCC    |
| DMD-53-c     | AGTTACCTGGGGAAACTAGC    |
| DMD-53-d     | GGCAGCTATTTGAGTGTCTC    |
| DMD-55-e     | CCCACTGAGAACTCCACTTGA   |
| DMD-55-f     | CTGTGAAGAAAGGCATTGGTAG  |
| DMD-50-g     | TTCCATGAAGGCAGTAGGGG    |
| DMD-50-h     | AAGCCTTCCATTTTGAGCGG    |
| DMD-3'-i     | GGATAAGGAATGGGAGAACTGGT |
| DMD-3'-j     | CAATAGCAGGGAAATGGTGTGC  |
| DMD-55-k     | TGCCCAGAGAAATTGTTGAGA   |
| DMD-55-l     | TTCCCTTTTCGGGCCAGTAT    |
