# Supplementary material for: Reclassification of DMD Duplications as Benign: Recommendations for Cautious Interpretation of Variants Identified in Prenatal Screening
Source: Genes (Basel). 2022 Oct 28;13(11):1972. doi: 10.3390/genes13111972 (PMC9690433; doi:10.3390/genes13111972)
Supplement: Supplementary file 1 [file genes-13-01972-s001.zip]

Archive with 6 entries (6 files):
- Supplementary Files/Supplementary Figure legends.pdf
- Supplementary Files/Supplementary Figure S1.pdf
- Supplementary Files/Supplementary Figure S1.tif
- Supplementary Files/Supplementary Figure S2.pdf
- Supplementary Files/Supplementary Figure S2.tif
- Supplementary Files/Supplementary Table S1.pdf
