# Supplementary figures and images for: Reclassification of DMD Duplications as Benign: Recommendations for Cautious Interpretation of Variants Identified in Prenatal Screening
Source: MDPI journal article supplement (doi:10.3390/genes13111972), 2022-10-28

II-1:

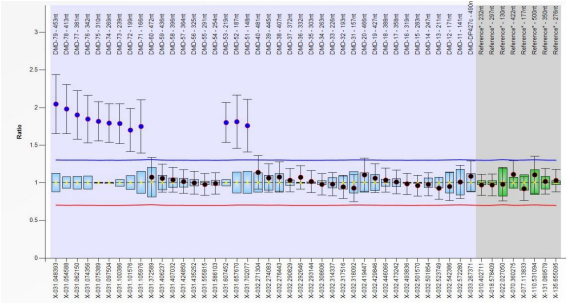

I-1:

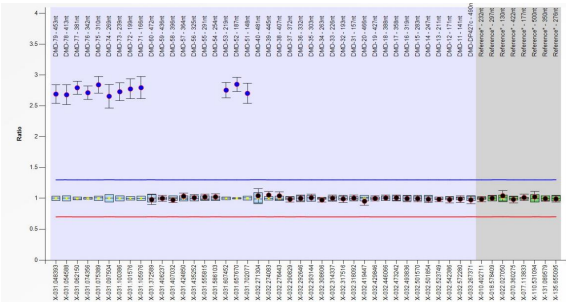

I-2:

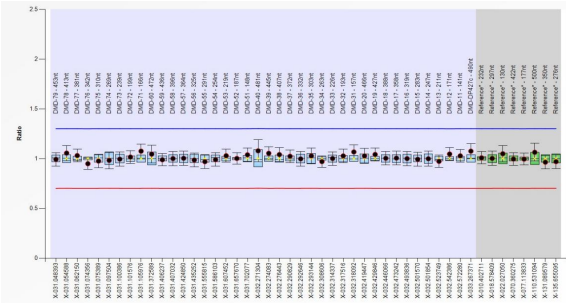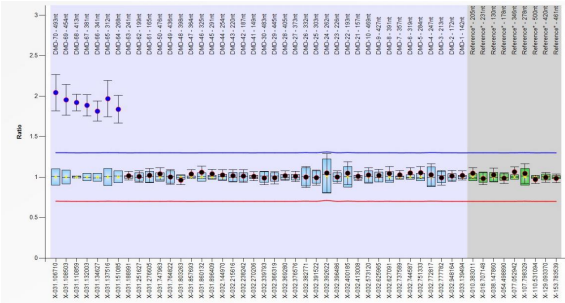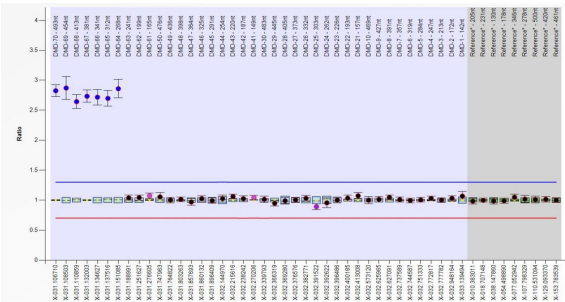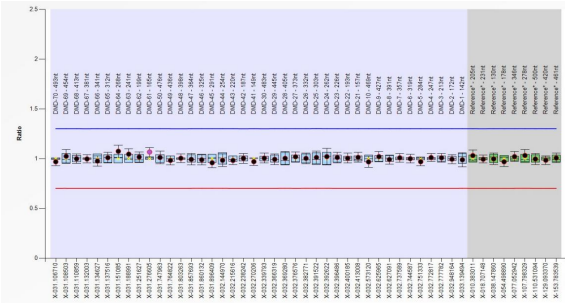

Supplement: s1 [file s1]

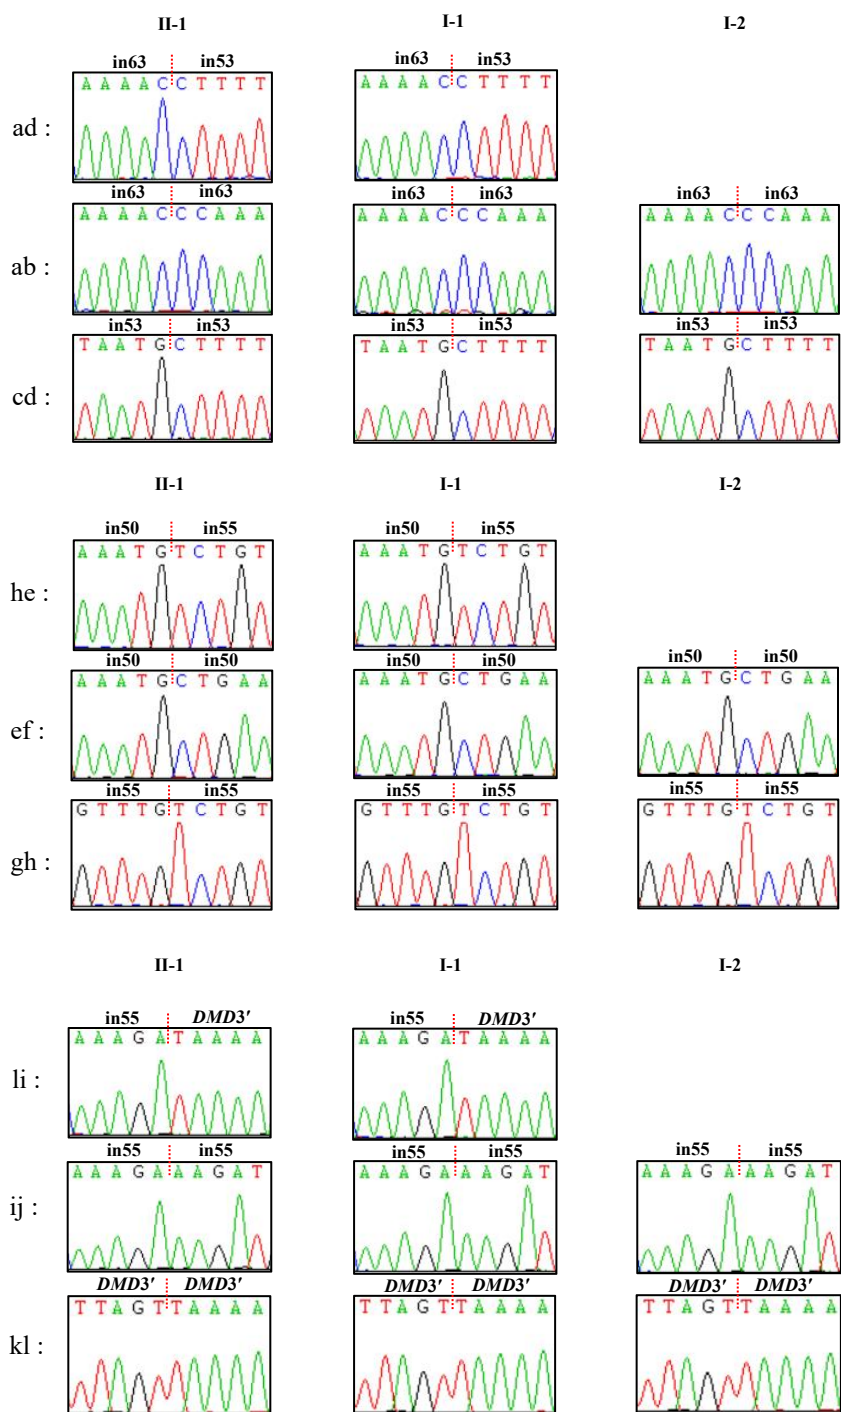

Supplement: s1 [file s1]
